# Supplementary material for: Effectiveness and cost-effectiveness randomised controlled trial of basic versus biofeedback-mediated intensive pelvic floor muscle training for female stress or mixed urinary incontinence: protocol for the OPAL (optimising pelvic floor exercises to achieve long-term benefits) trial mixed methods longitudinal qualitative case study and process evaluation
Source: PubMed Central journal article supplement (PMC6411251; doi:10.1136/bmjopen-2018-024152), 2019-02-08
Supplement: bmjopen-2018-024152.draft_revisions.pdf [file bmjopen-2018-024152.draft_revisions.pdf]

# BMJ Open

BMJ Open is committed to open peer review. As part of this commitment we make the peer review history of every article we publish publicly available.

When an article is published we post the peer reviewers' comments and the authors' responses online. We also post the versions of the paper that were used during peer review. These are the versions that the peer review comments apply to.

The versions of the paper that follow are the versions that were submitted during the peer review process. They are not the versions of record or the final published versions. They should not be cited or distributed as the published version of this manuscript.

BMJ Open is an open access journal and the full, final, typeset and author-corrected version of record of the manuscript is available on our site with no access controls, subscription charges or pay-per-view fees (<http://bmjopen.bmj.com>).

If you have any questions on BMJ Open's open peer review process please email [editorial.bmjopen@bmj.com](mailto:editorial.bmjopen@bmj.com)

# BMJ Open

**Effectiveness and cost-effectiveness randomised controlled trial of basic versus biofeedback-mediated intensive pelvic floor muscle training for female stress or mixed urinary incontinence: protocol for the OPAL (Optimising Pelvic floor Exercises to Achieve Long-term benefits) trial mixed methods longitudinal qualitative case study and process evaluation**

|                               |                                                                                                                                                                                                                                                                                                                                                                                                                                                                                                                                                                                               |
|-------------------------------|-----------------------------------------------------------------------------------------------------------------------------------------------------------------------------------------------------------------------------------------------------------------------------------------------------------------------------------------------------------------------------------------------------------------------------------------------------------------------------------------------------------------------------------------------------------------------------------------------|
| Journal:                      | <i>BMJ Open</i>                                                                                                                                                                                                                                                                                                                                                                                                                                                                                                                                                                               |
| Manuscript ID                 | bmjopen-2018-024152                                                                                                                                                                                                                                                                                                                                                                                                                                                                                                                                                                           |
| Article Type:                 | Protocol                                                                                                                                                                                                                                                                                                                                                                                                                                                                                                                                                                                      |
| Date Submitted by the Author: | 23-May-2018                                                                                                                                                                                                                                                                                                                                                                                                                                                                                                                                                                                   |
| Complete List of Authors:     | Grant, Aileen; Robert Gordon University, School of Nursing and Midwifery<br>Dean, Sarah; PenCLAHRC University of Exeter Medical School, Hay-smith, Jean; University of Otago Wellington, Rehabilitation Teaching and Research Unit<br>Hagen, Suzanne; Nursing Midwifery and Allied Health Professions Research Unit<br>McClurg, Doreen; Glasgow Caledonian University, NMAHP RU<br>Taylor, Anne; University of Stirling, Health Sciences and Sport<br>Kovandzic, Marija; University of Stirling, Health Sciences and Sport<br>Bugge, Carol; University of Stirling, Health Sciences and Sport |
| Keywords:                     | Urinary incontinence, pelvic floor muscle training, biofeedback, process evaluation, qualitative, comparative case study                                                                                                                                                                                                                                                                                                                                                                                                                                                                      |
|                               |                                                                                                                                                                                                                                                                                                                                                                                                                                                                                                                                                                                               |

SCHOLARONE™  
Manuscripts

**Effectiveness and cost-effectiveness randomised controlled trial of basic versus biofeedback-mediated intensive pelvic floor muscle training for female stress or mixed urinary incontinence: protocol for the OPAL (Optimising Pelvic floor Exercises to Achieve Long-term benefits) trial mixed methods longitudinal qualitative case study and process evaluation**

Aileen Grant

School of Nursing and Midwifery

Robert Gordon University

Aberdeen. AB10 7QB. United Kingdom (UK)

[a.grant17@rgu.ac.uk](mailto:a.grant17@rgu.ac.uk)

01224 272983 (Corresponding author)

Sarah Dean

South West Peninsula Collaboration for Leadership in Applied Research in Health Care (PenCLAHRC)

University of Exeter

Exeter. EX1 2LU. UK

Jean Hay-Smith

Rehabilitation Teaching and Research Unit

University of Otago, Wellington

Wellington 6242. New Zealand

Suzanne Hagen

Nursing, Midwifery, and Allied Health Professions Research Unit

Glasgow Caledonian University

Glasgow. G4 OBA UK

Doreen McClurg

Nursing, Midwifery, and Allied Health Professionals Research Unit

1  
2  
3 Glasgow Caledonian University

4  
5 Glasgow. G4 OBA UK

6  
7  
8  
9 Anne Taylor

10 Faculty of Health Sciences and Sport

11  
12 University of Stirling

13  
14 Stirling. FL9 4LA. UK

15  
16  
17  
18 Marija Kovandzic

19 Faculty of Health Sciences and Sport

20  
21 University of Stirling

22  
23 Stirling. FL9 4LA. UK

24  
25  
26  
27  
28 Carol Bugge

29 Faculty of Health Sciences and Sport

30  
31 University of Stirling

32  
33 Stirling. FL9 4LA. UK

34  
35  
36 **WORD COUNT: 3552**

**ABSTRACT:****Introduction**

Female urinary incontinence (UI) is common affecting up to 45% of women. Pelvic floor muscle training (PFMT) is the first-line treatment but there is uncertainty whether intensive PFMT is better than basic PFMT for long-term symptomatic improvement. It is also unclear which factors influence women's ability to perform PFMT long-term and whether this impacts on long-term outcomes. OPAL (Optimising PFMT to achieve long-term benefits) trial examines the effectiveness and cost-effectiveness of basic PFMT versus biofeedback mediated PFMT and this evaluation explores women's experiences of treatment and the factors which influence effectiveness. This will provide data aiding interpretation of the trial findings; make recommendations for optimising the treatment protocol; support implementation in practice; and, address gaps in the literature around long-term adherence to PFMT for women with stress or mixed UI.

**Methods and analysis**

This evaluation comprises a longitudinal qualitative case study and process evaluation. The case study aims to explore women's experiences of treatment and adherence and the process evaluation will explore factors influencing intervention effectiveness. The case study has a two-tailed design and will recruit 40 women, 20 from each trial group; they will be interviewed four times over two years. Process data will be collected from women through questionnaires at four time-points, from health professionals through checklists and interviews; and by sampling 100 audio-recordings of appointments. Qualitative analysis will use case study methodology (qualitative study) and the framework technique (process evaluation) and will interrogate for similarities and differences between the trial groups regarding barriers and facilitators to adherence. Process data analyses will examine fidelity, engagement and mediating factors using descriptive and interpretative statistics.

**Ethics and dissemination:** Approval from West of Scotland Research Ethics Committee 4 (16/LO/0990). Findings will be published in journals, disseminated at conferences and through the final report.

**Registration:** January 2014 ISRCTN number 57746448.

**KEY WORDS:** Urinary incontinence, pelvic floor muscle training, biofeedback, process evaluation, qualitative, longitudinal, comparative case study

**ARTICLE SUMMARY****Strengths and limitations of this study**

- In line with contemporary process evaluation guidance this is an in-depth, pre-planned and theoretically driven process evaluation and longitudinal comparative qualitative case study to support understanding of two complex interventions that aim to reduce a common and costly health care problem.
- A strength of the case study is the large number of cases and its two tailed longitudinal design that works in parallel with the trial to support understanding and exploration of the dynamic nature of implementation, context and adherence to PFMT treatment regimes.

- This is the first process evaluation in a urinary incontinence trial, adding insights not just into the trial outcome but also to understanding of the behavioural aspects of therapy and the important factors for successful treatment delivery and intervention fidelity.
- The main limitation of this work will be the likely high volume of data generated, this will require phased analyses and reporting to ensure all in-depth evaluation is disseminated.

## INTRODUCTION

Urinary incontinence (UI), the involuntary loss of urine, is a common condition in women. The prevalence of UI depends on the definition, using a broad definition between 5% and 69% is reported but most studies report the range 25% to 45% of women internationally.<sup>1</sup> The main types of UI are stress, urgency and mixed incontinence, with stress incontinence being the most prevalent affecting approximately 50% of women with UI; mixed UI affects 7.5% to 25% and urgency affects approximately 1% to 7% of women with UI. The cost to the United Kingdom's National Health Service (NHS) was estimated at £233million in 2000<sup>2</sup> and the personal costs to women estimated to be £178 million.<sup>3</sup>

Pelvic floor muscle training (PFMT) is the first line treatment for stress and mixed UI<sup>4</sup> and there is good evidence to show PFMT is effective in the short term (Dumoulin et al; Imamura et al). However it is not clear whether or how common intensifiers of PFMT (e.g. more contact with health professionals, use of adjuncts such as biofeedback) increase longer-term PFMT adherence, and the duration of effect. A recent series summarising the PFMT adherence literature<sup>5-9</sup> does suggest self-efficacy is one factor influencing women's ability to continue to perform self-care, such as PFMT, after treatment but there is a need for more research in this area to identify the full range of factors and how these impact on their UI symptoms in the longer-term.

Biofeedback (audio and/or visual feedback from a pressure or force-sensitive or electromyography device of a contraction of pelvic floor muscles) is often used as an adjunct to PFMT. A Cochrane review of the effectiveness of PFMT augmented with biofeedback concluded that women receiving biofeedback were more likely to report improved symptoms or cure than women who did not receive biofeedback however the effect might be confounded by greater amounts of health professional contact in women receiving biofeedback.<sup>10</sup> As a result Hagen and colleagues are conducting a large multicentre randomised control trial of the effectiveness and cost-effectiveness of long-term adherence to basic versus biofeedback-mediated intensive PFMT for female stress or mixed urinary incontinence (OPAL), with the same amount of health professional contact in both trial groups.<sup>11</sup> Unique to the trials conducted so far in this field, the OPAL trial has an embedded mixed-methods process evaluation (PE) to explore factors impacting on short and long-term adherence to PFMT, and any other mediating factors for treatment delivery and effectiveness. This process evaluation will draw on analysis of multiple datasets generated throughout the trial including the interviews with the therapists, audio-recorded consultations, treatment checklists and trial participant questionnaires, as well as on the findings from the longitudinal qualitative interviews exploring women's experiences of the OPAL intervention.

**Insert Figure 1: Trial flow diagram.**

**The OPAL trial**

1  
2  
3 The OPAL trial is a large multicentre, pragmatic randomised controlled trial of two active treatment  
4 interventions, basic PFMT and biofeedback-mediated PFMT for the treatment of stress or mixed UI.  
5 The trial has been fully described in the companion trial protocol paper and further information is  
6 available on the trial website ([www.opaltrial.co.uk](http://www.opaltrial.co.uk)). In brief, 'Intensive' PFMT consists of basic PFMT  
7 with adjunctive biofeedback at every clinic appointment and at home. Both 'basic' and 'intensive'  
8 treatment groups are offered six clinic appointments over the 16 week intervention period. Women  
9 in both groups receive pelvic floor muscle assessment,<sup>12</sup> vaginal palpation, verbal feedback and  
10 individualised exercise prescription based on this assessment, advice for bowel and bladder  
11 symptoms and tailored lifestyle advice. Treatment is delivered by women's health physiotherapists  
12 or continence nurses who have received training designed and delivered by the trial team.<sup>11</sup> The  
13 premise is that biofeedback will intensify PFMT by offering women more visible information about  
14 exercise outcomes, support motivation and enhance behavioural skill (e.g. improved contraction  
15 technique and confidence). The anticipated outcome of adjunctive biofeedback is improved quality  
16 and quantity of exercise, with expectation this will increase treatment benefit and reduce  
17 symptoms. However, the biofeedback intervention can only work to intensify PFMT if women use  
18 the device.  
19  
20  
21  
22

### 23 **The OPAL longitudinal qualitative case study and process evaluation**

24  
25 The OPAL evaluation has a comprehensive and well-resourced longitudinal qualitative comparative  
26 case study and mixed method process evaluation running parallel to the trial, to provide important  
27 insights to the trial's processes and outcomes: to explain how the interventions worked (what  
28 factors led to the observed effect); assist in interpretation of the trial findings; and facilitate  
29 transferability into clinical practice (if effective) and further research (in particular if not effective).  
30 This design is rather unusual but allows the researchers to preserve multiple perspectives and  
31 contribute to the robustness of the complex analysis of factors mediating the trial delivery and  
32 findings. These studies will be cross referenced to support more comprehensive explanations of how  
33 the interventions work and assist in interpreting the trial findings. We describe each study in more  
34 detail below:  
35  
36

37  
38 The qualitative case study is longitudinal in nature to mirror the trial data collection, to capture the  
39 dynamic nature of treatment delivery and participants' experiences, to generate more in-depth data  
40 about what works well (or not) when intensifying treatment regimens, and most importantly in this  
41 trial to better understand the factors important to long-term adherence to PFMT. Within the trials  
42 literature this longitudinal methodological design is rare, but it is needed to capture the dynamic  
43 nature of implementation and adherence to long-term PFMT treatment regimens; furthermore, the  
44 commissioning call for this work explicitly requested a qualitative study to explore women's  
45 experience and barriers to adherence. This qualitative case study will also make an important  
46 contribution to understanding the behavioural aspects of therapy which are rarely documented.  
47  
48

49  
50 The process evaluation aims to provide transparency by exploring implementation of the  
51 interventions in context.<sup>13</sup> Variation in implementation of the OPAL interventions is likely to be due  
52 to: the different intervention components; the diverse clinical settings (university hospital, district  
53 general hospital, community settings) and health professionals delivering (women's health  
54 physiotherapists and incontinence specialist nurses); and, the contextual and personal differences  
55 between women receiving the interventions and adhering to PFMT long-term. These different  
56  
57  
58  
59  
60

factors are likely to influence how well the interventions are integrated within existing practice and women's lives and may impact on the trial findings. As a result, we believe it is important to explore delivery (including fidelity and dose - if the intervention components are being delivered as intended and in what quantity across the different trial centres), response (participant's experiences of the intervention), and maintenance (how and why these processes are sustained over time or not by women and therapists during the intervention delivery and by women after the intervention delivery is complete).<sup>13</sup> For delivery, we are particularly interested in fidelity of function<sup>14</sup> as clinicians were given a protocol to follow with the expectation that they would individualise this (the exact exercise prescription, life-style advice etc.) to the care each woman required, however there were also specific behaviour change techniques that were to be used for all women (and not individualised) and so we will also be investigating fidelity of form for this element of the interventions. Women's experiences of receiving treatment in clinic and how they engage with PFMT at home is important to how they respond to the interventions. As OPAL is interested in long-term adherence to PFMT it is important to explore how women maintain their adherence (or not) and the factors which facilitated or impeded this. It is hypothesised that self-efficacy will be a mediating factor to intervention effectiveness. The longitudinal qualitative case study will support the process evaluation by providing data on 'response' and 'maintenance' to explain the women's experiences of receiving treatment, how and why they engaged with PFMT and/or biofeedback PFMT in the clinic and at home during treatment and how and why they maintained engagement (or not) over time.

### **Aim and objectives**

The overall aim of this mixed method evaluation is to understand why the interventions were effective or ineffective, understand implementation and the issues in short and long-term adherence to PFMT and to inform wider implementation (or further research if ineffective) as well as the PFMT intervention literature. Although inter-linked we describe each parallel evaluation (see Figure x) separately to facilitate clarity as each evaluation has a specific objective.

Longitudinal comparative qualitative case study objective:

To investigate women's experiences of the interventions, both basic and intensive PFMT, to identify the barriers and facilitators which impact on adherence in the short- and long-term, to explain the process through which they influence adherence, and to identify whether these differ between randomised groups.

Process evaluation objective:

To identify and investigate the possible mediating factors that impact upon the effectiveness of the intervention (including intervention fidelity), how these mediating factors influence effectiveness, and whether the factors differ between randomised groups.

### **Management and Governance**

Ethical approval was granted by the West of Scotland Research Ethics Committee 4 (16/LO/0990) and the trial was registered on the ISRCTN registry (ISRCTN 57746448).

The longitudinal comparative qualitative case study and process evaluation management group has a mix of relevant clinical, qualitative, quantitative and theoretical skills and experience<sup>15</sup> and meets



regularly to discuss the research management and emerging findings. In order to ensure allocation concealment is maintained, it has been agreed that this team will not discuss or present findings from this study with any staff from the main trial project management group. As a result these meetings are closed.

## **METHODS AND ANALYSIS**

### **Methods for longitudinal comparative qualitative case study**

A longitudinal, qualitative, two-tailed case study design<sup>16</sup> utilising semi-structured interviews with purposively sampled women from both groups to explore experience of, and adherence to, the trial interventions. The tails will be the experimental and comparator groups of the trial. Using a two tailed case study design complements the trial design in its comparative focus. The analysis, like the trial analysis, is set up to explore differences between the 'tails' or groups. In the case study design the differences can be exposed and support understanding of effectiveness (or non-effectiveness).

### **Sampling and recruitment strategy**

Thirty to 40 randomised women (15 to 20 in each tail) will be purposively sampled for variance in centre type (district general hospital, university hospital, community delivered service), women's type of UI (stress or mixed) and therapist type (physiotherapist/ nurse), as case studies. Purposively selected women, who have consented to the trial, will be given an additional information leaflet and asked if they are interested in taking part in an interview study. Interested women will be contacted by telephone approximately a week later to ask if they would like to participate. If a woman declines to consent to the interview study, another woman with similar characteristics will be selected and approached. Formal written consent will be collected at the time of the first face-to-face interview. We anticipate some attrition of women by the 12 and 24 month interviews, however we have oversampled to ensure sufficient heterogeneity to identify barriers and facilitators to response to the interventions, and to generate hypotheses about the factors associated with differing outcomes, including long-term adherence to PFMT.

### **Qualitative data collection**

Data will be collected by a series of semi-structured interviews at baseline, 6, 12 and 24 months (12 and 24 months by telephone). Each interview will have a specific focus:

- Baseline (pre-treatment) interview (face-to-face) will explore the woman's experience of UI, the social contexts within which she experiences UI, and her expectations of treatment.
- Six month interview (face-to-face) will explore the woman's experience of the trial intervention, her adherence to therapy appointments and the prescribed programme, and factors that affected that adherence, and her perceptions of treatment outcome.
- 12 month interview (telephone) will explore the woman's experience of UI post-intervention, of the intervention, of factors that influence ongoing adherence to PFMT and of treatment outcome.
- 24 month interview (telephone) will explore the same issues as at 12 months but with a focus on the longer-term.

1  
2  
3 Interview data will be collected using a password protected audio digital recorder.  
4

### 5 **Qualitative case study data analysis**

6 Interview audio-recordings will be transcribed verbatim and entered into QSR NVivo software to  
7 support analysis. Analysis will be iterative with data generation and will take place on four  
8 interacting levels to facilitate within and cross case comparisons to ensure comprehensive  
9 examination which exposes the similarities and differences between the experimental and  
10 comparator groups and identifies barriers and facilitators to adherence:  
11

12  
13 • *At the level of the individual interview.* An initial *a priori* coding scheme will be applied that focuses  
14 on core areas of interest: specifically, women's experiences of UI; experience of PFMT +/-  
15 biofeedback; factors that influence adherence to supervised treatment and home exercise; and  
16 perceptions of treatment outcome. Research team discussions and constant iterative coding will  
17 further develop the coding scheme. The combination of the *a priori* scheme and inductive codes will  
18 aim, at this stage, to identify barriers and facilitators that influence adherence.  
19

20  
21 • *At the level of the case (woman).* Case summaries will be written with a focus on creating an  
22 understanding of women's experience in our areas of interest: the problem, the treatment,  
23 adherence to supervised treatment and home exercise; perceptions of treatment outcome and how  
24 these factors interact. Analysis at this stage will focus on identifying issues relating to changes over  
25 time and in developing theoretical propositions to guide subsequent analysis (Yin 2003).  
26

27  
28 • *At the level of the trial group.* All the cases for one trial group will be collected together and  
29 consistencies/ inconsistencies searched for. The aim of analysis at this stage is to identify the core  
30 barrier and facilitators within the trial group, the detailed explanations for them and interactions  
31 between them.  
32

33  
34 • *At the tail level.* The experimental and comparator tails will be compared to one another using the  
35 theoretical propositions. The aim of the analysis at this point is to identify similarities and differences  
36 in barriers and facilitators between the trial groups.  
37

### 38 **Methods for process evaluation**

39  
40 This mixed methods process evaluation will focus on assessing fidelity of function (with additional  
41 checking of fidelity of form for the behavioural change techniques)<sup>14</sup> and explore delivery and  
42 implementation with therapists delivering the interventions in all centres. Fidelity will be assessed  
43 using theory-based and protocol-linked checklists completed by therapists at each appointment a  
44 woman attends and audio-recordings of a purposive sample of 100 therapy appointments which will  
45 be assessed against a theory driven framework derived from the trial protocol. Qualitative telephone  
46 interviews will be conducted with health professionals delivering the interventions at the end of  
47 their involvement in the trial. This is a concurrent study design with all methods being used  
48 simultaneously.  
49

### 50 **Process evaluation sampling and recruitment strategy and data collection**

- 51  
52  
53  
54 1. A protocol checklist will be completed by all therapists after each appointment. The checklist  
55 will allow assessment of protocol deviations (as defined in the main trial and for statistical  
56

analysis purposes). It will also allow explanation of the clinically informed and permitted variance in delivery through tailoring of the intervention based on individual women's needs; alongside an explanation of the reasons the variance occurred.

2. Audio-recordings will be conducted with a purposive sample of 100 appointments. These will be sampled for heterogeneity across: the comparator and experimental groups; the different therapy appointments (in both groups six therapy appointments across sixteen weeks); centre (aiming for inclusion of appointments at all centres); woman's type and severity of UI; and, therapist type (physiotherapist or incontinence nurse). Each centre will be provided with a password-protected audio digital recorder to record the selected appointments. We will aim to over sample audio-recordings for the first and last appointments due to our a priori hypothesis that treatment delivery may be more intensive and concentrated in the first and last appointments. The first appointment is a longer consultation and involves important education and training for being taught how to properly perform PFMT, where relevant including teaching of biofeedback, and for understanding any changes to lifestyle that may be recommended. The last appointment is important because therapy is coming to an end and women are being given important information to allow them to self-care, such as instructions regarding the maintenance dose of PFMT. If participants have signed on their consent form that they are willing to have an appointment audio-recorded, the researcher will purposively select participants and telephone them to ask if they would be willing to have a specific appointment recorded, answer any questions they may have and to take verbal consent. Therapists will then be informed which participants and appointments to record. The audio-recording devices will be returned to the researcher at regular intervals to download the data and to ensure the audio consultations are transcribed verbatim.
3. Semi-structured telephone interviews will be undertaken with therapists who have been involved in delivering the interventions at the end of their participation. We aim to interview at least one therapist from each site. A topic guide developed from the literature and from issues which have arisen during delivery of the intervention and from patient interviews will be utilised. The interviews will explore the therapist's experiences of delivering the PFMT and BF PFMT interventions, including their perspectives on adherence to delivering the protocols and women's adherence to intervention.
4. The trial follow-up questionnaires will include questions on women's adherence and self-efficacy to PFMT during and after the supervised intervention which will contribute to the process evaluation. This data will be analysed like secondary outcome measures (please see Hagen et al for more details).<sup>11</sup> In addition, the interview study (described earlier) will provide data from the women about adherence to treatment to feed into the process evaluation.

### **Process evaluation analysis**

Each data source will be analysed individually in the first instance to reach separate conclusions:

1. Data from the checklists completed by the therapists will be summarised descriptively to report the extent to which there were consistent with the protocol. Free text comments

1  
2  
3 from the therapists relating to any barriers and facilitators to delivering the protocol and any  
4 variations due to individual tailoring they experienced during appointments will be coded  
5 using a coding framework developed using content analysis with a 10% representative  
6 sample of appointments.  
7

- 8  
9
2. Data from interviews with therapists will be analysed using the Framework Approach (Ritchie et al).<sup>17</sup> Following familiarisation with the data, a thematic framework will be developed and applied across the data set. Data will then be tabulated and conceptual maps used to make links between themes. Where possible in-vivo codes and concepts will be utilised.  
11  
12  
13  
14
  3. A quantitative coding scheme will be developed for analysis of the appointment audio-recordings. This coding scheme will be developed using the intervention protocols and the theory underlying the protocols, and data generated from a purposive sample of recordings (treatment arm, visit number and site). The coding scheme will contain explicit guidance as to what codes have to be applied in what circumstances. The audio recordings will then be coded and entered into SPSS. Coded data will then be subject to descriptive and interpretive analysis.  
16  
17  
18  
19  
20  
21  
22  
23
  4. Data from main study self-report questionnaires will be analysed in line with the Statistical Analysis Plan. Specifically, and as indicated in the main standard operating procedure, we will undertake a mediational analyses as part of the quantitative process evaluation, this will focus on the self-efficacy data as our hypothesised mediating variable. The details of the mediational analyses are described in the process evaluation analysis plan.  
24  
25  
26  
27  
28  
29  
30

### 31 **Synthesising the data from the longitudinal comparative case study and the process evaluation**

32  
33 Synthesis will be undertaken once both analyses are complete, where the case study analysis will be  
34 cross referenced and synthesised with the process evaluation findings. Data synthesis will be  
35 undertaken whereby the findings from individual data sources will be presented in matrices that  
36 bring together key issues from the different analyses to draw hypotheses about why the  
37 intervention components were implemented more successfully than others and explore if there is a  
38 synergistic effect and if these are related to patient's experiences of BF PFMT and PFMT treatment.  
39 We will also elucidate the causal mechanisms which lead to change (or not) in each arm and suggest  
40 which components of the interventions were more successful and why. The combined data will also  
41 allow us to present a nuanced analysis of context. This will provide important information about  
42 implementation of the interventions and if and how the interventions can be transferred to other  
43 settings.  
44  
45  
46

### 47 **Integration of the case study, process evaluation and trial findings**

48  
49 Both studies will be analysed separately before the outcome of the trial is known and the main trial  
50 will be analysed without knowledge of the longitudinal case study and process evaluation findings.<sup>18</sup>  
51 The main trial research team and the research team have agreed that no case study/process  
52 evaluation data will be shared before the trial code is broken. Following identification of the main  
53 trial findings, subsequent analysis of the case study and process evaluation data will be undertaken.  
54  
55  
56  
57  
58  
59  
60

There will be transparency in reporting which findings were identified prior to, and after, the trial findings being known.

### Public patient involvement

OPAL has a woman who has experience of urinary incontinence (UI) as a grantholder and has patient representation on the Trial Steering Committee. Through these inputs, the research question, outcome measures, and study design have all had women's perspectives included. Patient facing recruitment materials were all reviewed by women with urinary incontinence. Women were not involved in other aspects of study recruitment or conduct. Participants will all receive a lay summary of the results of the study. The burden of the intervention was assessed by our grant holder with UI. Our grantholder is named as an author on our main trial protocol paper.

### ETHICS AND DISSEMINATION

The study will be conducted in accordance with the ICH GCP Note for Guidance on Good Clinical Practice. Favourable ethics opinion covering recruitment across all UK NHS centres was obtained and approved from the Regional NHS Ethics Committee and local R&D departments.

Final trial results will be disseminated to the funding body, the NIHR Health Technology Assessment Programme. The trial results will be then submitted to peer-reviewed journals and presented at international conferences. Participants will be provided with a summary of the results.

### REFERENCES

1. Abrams P, Cardozo L, Wagg A, et al. Incontinence. 6th ed. Bristol: Health Publications Ltd 2017.
2. Perry S, Shaw C, Assassa P, et al. An epidemiological study to establish the prevalence of urinary symptoms and felt need in the community: the Leicestershire MRC Incontinence Study. Leicestershire MRC Incontinence Study Team. *Journal of public health medicine* 2000;22(3):427-34.
3. Turner DA, Shaw C, McGrother CW, et al. The cost of clinically significant urinary storage symptoms for community dwelling adults in the UK. *BJU international* 2004;93(9):1246-52. doi: 10.1111/j.1464-410x.2004.04806.x [doi]
4. NICE. Urinary incontinence in women. Quality standard (QS77). National Institute for Health and Care Excellence, 2015.
5. Dumoulin C, Hay-Smith J, Frawley HC, et al. 2014 Consensus statement on improving pelvic floor muscle training adherence: International continence society 2011 state-of-the-science seminar. *Neurourology and urodynamics* 2015;1-6. doi: 10.1002/nau.22796
6. Frawley HC, McClurg D, Mahfooza A, et al. Health professionals' and patient perspectives on pelvic floor muscle training adherence - 2011 ICS State-of-the-science seminar research paper IV of IV *Neurourology and urodynamics* 2015;34:632-39. doi: 10.1002/nau.22774
7. Hay-Smith J, Dean S, Burgio K, et al. Pelvic floor muscle training adherence "modifiers": A review of primary qualitative studies - 2011 ICS State-of-the-science seminar research paper III of IV *Neurourology and urodynamics* 2015;34:622-31. doi: 10.1002/nau.22771
8. Dumoulin C, Alewijnse D, Bo K, et al. Pelvic floor muscle training: Tools, measurements and strategies - 2011 ICS State-of-the-science seminar research paper II. *Neurourology and urodynamics* 2015;1-7. doi: 10.1002/nau.22794

9. McClurg D, Frawley HC, Hay-Smith J, et al. Scoping review of adherence promotion theories in pelvic floor muscle training - 2011 ICS State-of-the-science seminar research paper I of IV. *Neurourology and urodynamics* 2015;1-9. doi: 10.1002/nau.22769
10. Herderschee R, Hay-Smith J, Herbison G, et al. Feedback or biofeedback to augment pelvic floor muscle training for urinary incontinence in women. *Cochrane Database of Systematic Reviews* 2011(7):CD009252.
11. Hagen S, McClurg D, Bugge C, et al. Effectiveness and cost-effectiveness of basic versus biofeedback-mediated intensive pelvic floor muscle training for female stress or mixed incontinence: protocol for the OPAL randomised controlled trial. Submitted to BMJ Open
12. Laycock J, Jerwood D. Pelvic floor muscle assessment: The PERFECT scheme. *Physiotherapy* 2001;87(12):631-42.
13. Grant A, Treweek S, Dreischulte T, et al. Process evaluations for cluster-randomised trials of complex interventions: a proposed framework for design and reporting. *Trials* 2013;14(1):15.
14. Hawe P, Shiell A, Riley T. Complex interventions: how "out of control" can a randomised controlled trial be? *British medical journal* 2004;328(7455):1561-63.
15. Medical RC. Process evaluation of complex interventions: UK Medical Research Council (MRC) guidance. 2015
16. Yin R. Case Study Research: Design and Methods. London: Sage Publications 2003.
17. Ritchie J, Spencer L, O'Connor W. Carrying out Qualitative Analysis. In: Ritchie J, Lewis J, eds. *Qualitative Research Practice, A guide for Social Science Students and Researchers*. London: Sage Publications Ltd 2003.
18. Oakley A, V S, Bonell C, et al. Process evaluation in randomised controlled trials of complex interventions. *British medical journal* 2006;332(7538):413-16.

#### **AUTHOR CONTRIBUTIONS**

CB, SD, JHS were involved in the initial conceptualisation and study design, AG and AT are involved with participants and data collection and CB, SD, AG, JHS, MK, AT are involved in data analysis. AG wrote the paper. All authors contributed to, read and approved the final manuscript. CB is responsible for this manuscript.

#### **FUNDING ACKNOWLEDGEMENT**

This project, Optimising Pelvic floor Exercises to Achieve Long-term benefits (OPAL) is funded by the NIHR Health Technology Assessment Programme (project reference: 11/71/03). The authors also acknowledge the support of the National Institute for Health Research, through the Comprehensive Clinical Research Network. SD's position is partly supported by the National Institute for Health Research (NIHR) Collaboration for Leadership in Applied Health Research and Care South West Peninsula at the Royal Devon and Exeter NHS Foundation Trust.

#### **DEPARTMENT OF HEALTH AND SOCIAL CARE DISCLAIMER**

The views expressed are those of the authors and not necessarily those of the NHS, the NIHR or the Department of Health and Social Care.

#### **COMPETING INTERESTS STATEMENT**

The authors declare they have no competing interests.

1  
2  
3  
4  
5  
6  
7  
8  
9  
10  
11  
12  
13  
14  
15  
16  
17  
18  
19  
20  
21  
22  
23  
24  
25  
26  
27  
28  
29  
30  
31  
32  
33  
34  
35  
36  
37  
38  
39  
40  
41  
42  
43  
44  
45  
46  
47  
48  
49  
50  
51  
52  
53  
54  
55  
56  
57  
58  
59  
60

For peer review only

# THE OPAL TRIAL

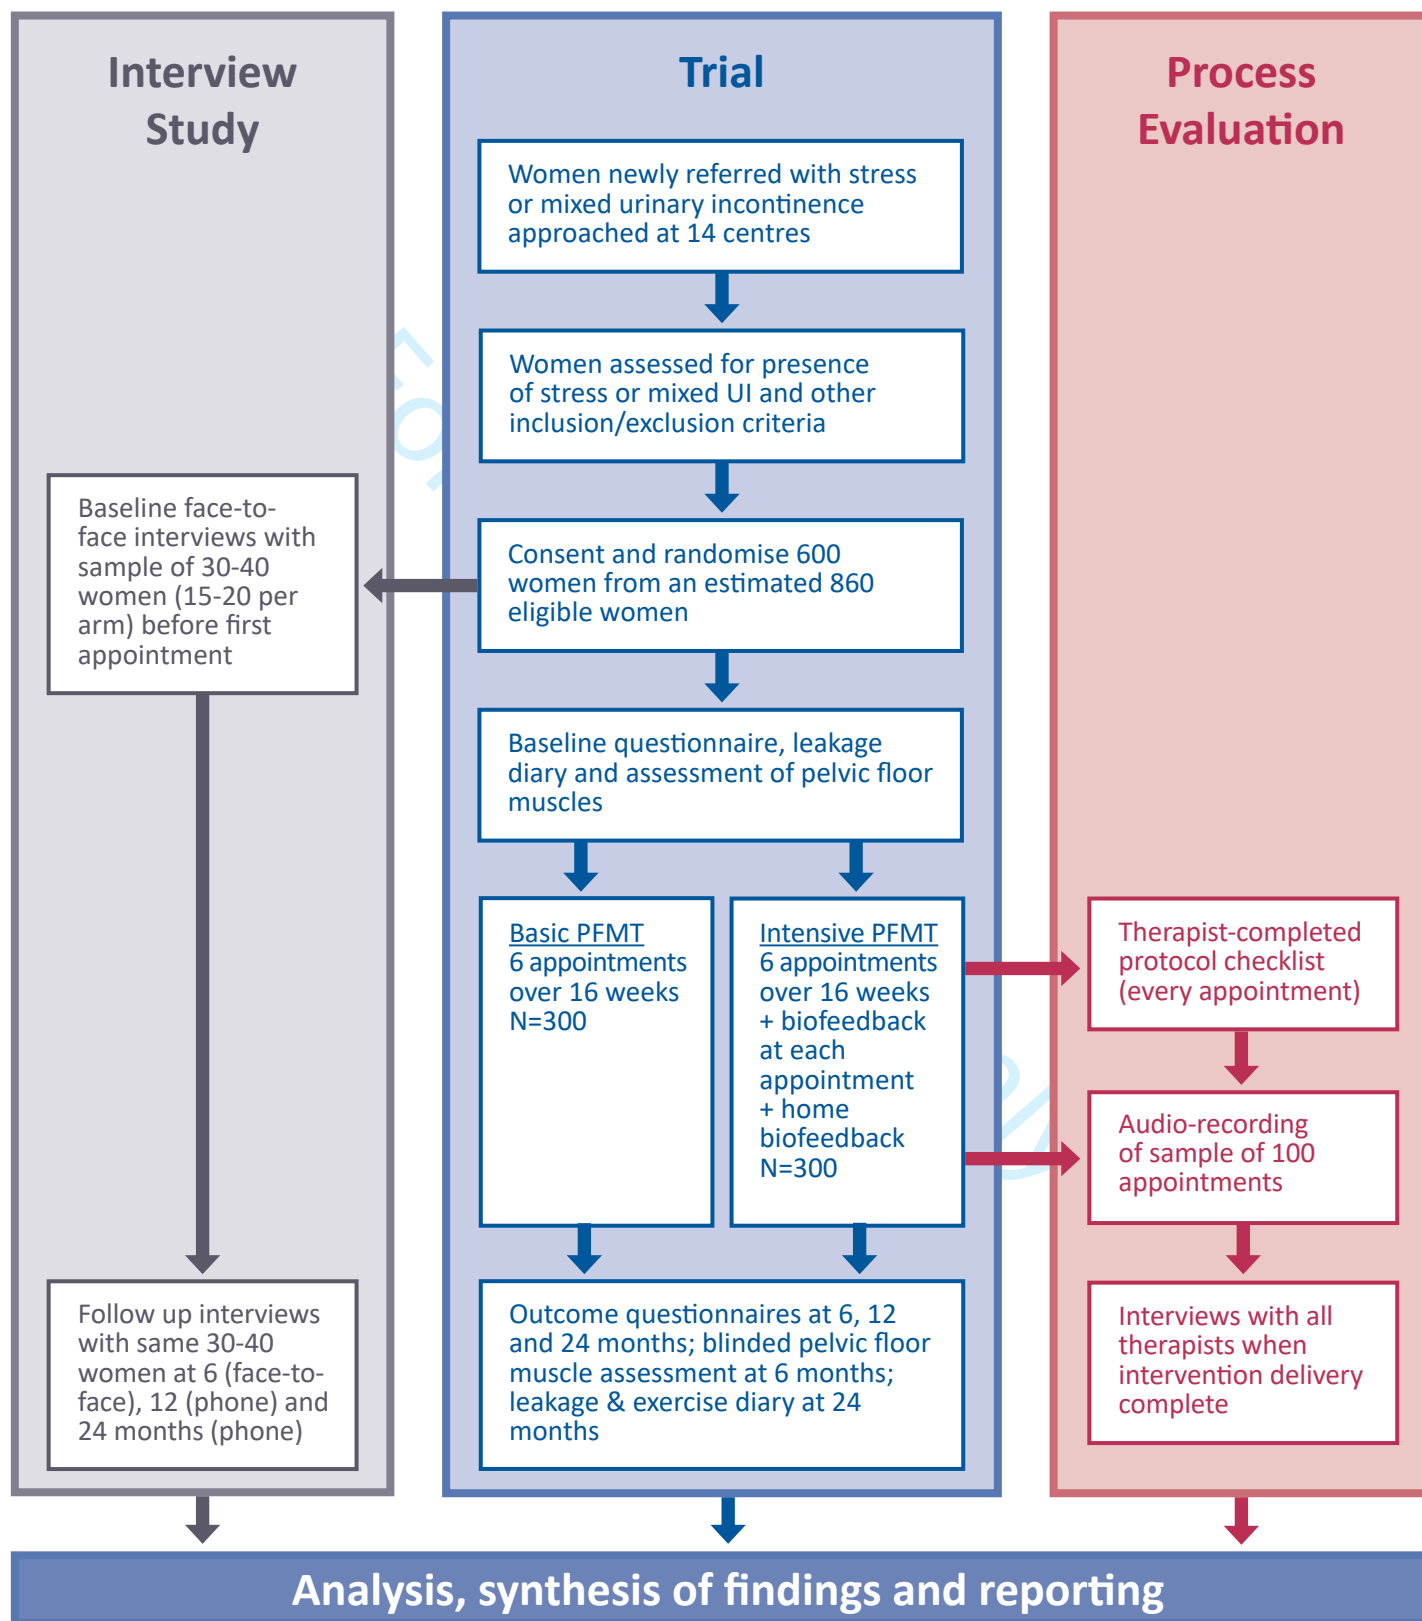



# BMJ Open

**Effectiveness and cost-effectiveness randomised controlled trial of basic versus biofeedback-mediated intensive pelvic floor muscle training for female stress or mixed urinary incontinence: protocol for the OPAL (Optimising Pelvic floor Exercises to Achieve Long-term benefits) trial mixed methods longitudinal qualitative case study and process evaluation**

|                                 |                                                                                                                                                                                                                                                                                                                                                                                                                                                                                                                                                                                               |
|---------------------------------|-----------------------------------------------------------------------------------------------------------------------------------------------------------------------------------------------------------------------------------------------------------------------------------------------------------------------------------------------------------------------------------------------------------------------------------------------------------------------------------------------------------------------------------------------------------------------------------------------|
| Journal:                        | <i>BMJ Open</i>                                                                                                                                                                                                                                                                                                                                                                                                                                                                                                                                                                               |
| Manuscript ID                   | bmjopen-2018-024152.R1                                                                                                                                                                                                                                                                                                                                                                                                                                                                                                                                                                        |
| Article Type:                   | Protocol                                                                                                                                                                                                                                                                                                                                                                                                                                                                                                                                                                                      |
| Date Submitted by the Author:   | 22-Nov-2018                                                                                                                                                                                                                                                                                                                                                                                                                                                                                                                                                                                   |
| Complete List of Authors:       | Grant, Aileen; Robert Gordon University, School of Nursing and Midwifery<br>Dean, Sarah; PenCLAHRC University of Exeter Medical School, Hay-smith, Jean; University of Otago Wellington, Rehabilitation Teaching and Research Unit<br>Hagen, Suzanne; Nursing Midwifery and Allied Health Professions Research Unit<br>McClurg, Doreen; Glasgow Caledonian University, NMAHP RU<br>Taylor, Anne; University of Stirling, Health Sciences and Sport<br>Kovandzic, Marija; University of Stirling, Health Sciences and Sport<br>Bugge, Carol; University of Stirling, Health Sciences and Sport |
| <b>Primary Subject Heading</b>: | Urology                                                                                                                                                                                                                                                                                                                                                                                                                                                                                                                                                                                       |
| Secondary Subject Heading:      | Rehabilitation medicine, Health services research, Qualitative research                                                                                                                                                                                                                                                                                                                                                                                                                                                                                                                       |
| Keywords:                       | Urinary incontinence, pelvic floor muscle training, biofeedback, process evaluation, qualitative, comparative case study                                                                                                                                                                                                                                                                                                                                                                                                                                                                      |
|                                 |                                                                                                                                                                                                                                                                                                                                                                                                                                                                                                                                                                                               |

SCHOLARONE™  
Manuscripts

1  
2  
3 **Effectiveness and cost-effectiveness randomised controlled trial of basic versus biofeedback-**  
4 **mediated intensive pelvic floor muscle training for female stress or mixed urinary incontinence:**  
5 **protocol for the OPAL (Optimising Pelvic floor Exercises to Achieve Long-term benefits) trial mixed**  
6 **methods longitudinal qualitative case study and process evaluation**  
7  
8  
9

10  
11 Aileen Grant

12 School of Nursing and Midwifery

13 Robert Gordon University

14 Aberdeen. AB10 7QB. United Kingdom (UK)

15 [a.grant17@rgu.ac.uk](mailto:a.grant17@rgu.ac.uk)

16 01224 272983 (Corresponding author)

17  
18 Sarah Dean

19 South West Peninsula Collaboration for Leadership in Applied Research in Health Care (PenCLAHRC)

20 University of Exeter

21 Exeter. EX1 2LU. UK

22  
23 Jean Hay-Smith

24 Rehabilitation Teaching and Research Unit

25 University of Otago, Wellington

26 Wellington 6242. New Zealand

27  
28 Suzanne Hagen

29 Nursing, Midwifery, and Allied Health Professions Research Unit

30 Glasgow Caledonian University

31 Glasgow. G4 OBA UK

32  
33 Doreen McClurg

34 Nursing, Midwifery, and Allied Health Professionals Research Unit

1  
2  
3 Glasgow Caledonian University

4  
5 Glasgow. G4 OBA UK  
6  
7  
8

9 Anne Taylor

10  
11 Faculty of Health Sciences and Sport

12  
13 University of Stirling

14  
15 Stirling. FL9 4LA. UK  
16  
17  
18  
19

20 Marija Kovandzic

21  
22 Faculty of Health Sciences and Sport

23  
24 University of Stirling

25  
26 Stirling. FL9 4LA. UK  
27  
28  
29

30 Carol Bugge

31  
32 Faculty of Health Sciences and Sport

33  
34 University of Stirling

35  
36 Stirling. FL9 4LA. UK  
37  
38

39 **WORD COUNT:** 3552  
40  
41  
42  
43  
44  
45  
46  
47  
48  
49  
50  
51  
52  
53  
54  
55  
56  
57  
58  
59  
60

**ABSTRACT:****Introduction**

Female urinary incontinence (UI) is common affecting up to 45% of women. Pelvic floor muscle training (PFMT) is the first-line treatment but there is uncertainty whether intensive PFMT is better than basic PFMT for long-term symptomatic improvement. It is also unclear which factors influence women's ability to perform PFMT long-term and whether this impacts on long-term outcomes. OPAL (Optimising PFMT to achieve long-term benefits) trial examines the effectiveness and cost-effectiveness of basic PFMT versus biofeedback mediated PFMT and this evaluation explores women's experiences of treatment and the factors which influence effectiveness. This will provide data aiding interpretation of the trial findings; make recommendations for optimising the treatment protocol; support implementation in practice; and, address gaps in the literature around long-term adherence to PFMT for women with stress or mixed UI.

**Methods and analysis**

This evaluation comprises a longitudinal qualitative case study and process evaluation. The case study aims to explore women's experiences of treatment and adherence and the process evaluation will explore factors influencing intervention effectiveness. The case study has a two-tailed design and will recruit 40 women, 20 from each trial group; they will be interviewed four times over two years. Process data will be collected from women through questionnaires at four time-points, from health professionals through checklists and interviews; and by sampling 100 audio-recordings of appointments. Qualitative analysis will use case study methodology (qualitative study) and the framework technique (process evaluation) and will interrogate for similarities and differences between the trial groups regarding barriers and facilitators to adherence. Process data analyses will examine fidelity, engagement and mediating factors using descriptive and interpretative statistics.

**Ethics and dissemination:** Approval from West of Scotland Research Ethics Committee 4 (16/LO/0990). Findings will be published in journals, disseminated at conferences and through the final report.

**Registration:** January 2014 ISRCTN number 57746448.

**KEY WORDS:** Urinary incontinence, pelvic floor muscle training, biofeedback, process evaluation, qualitative, longitudinal, comparative case study

**ARTICLE SUMMARY****Strengths and limitations of this study**

- A strength is the design of an in-depth, pre-planned and theoretically driven process evaluation and longitudinal comparative qualitative case study to support understanding of two complex interventions.
- This evaluation will sample from women from both intervention arms and professionals from all centres delivering the interventions.

- A strength of the case study is the large number of cases and its comparative longitudinal design that works in parallel with the trial to explore implementation, context and adherence to PFMT treatment regimes.
- .
- A strength of the process evaluation is the range of data for triangulation.
- A limitation of this work is that we did not collect any data from sites prior to them delivering the interventions.

## INTRODUCTION

Urinary incontinence (UI), the involuntary loss of urine, is a common condition in women. The prevalence of UI depends on the definition, using a broad definition between 5% and 69% is reported but most studies report the range 25% to 45% of women internationally.<sup>1</sup> The main types of UI are stress, urgency and mixed incontinence, with stress incontinence being the most prevalent affecting approximately 50% of women with UI; mixed UI affects 7.5% to 25% and urgency affects approximately 1% to 7% of women with UI. The cost to the United Kingdom's National Health Service (NHS) was estimated at £233million in 2000<sup>2</sup> and the personal costs to women estimated to be £178 million.<sup>3</sup>

Pelvic floor muscle training (PFMT) is the first line treatment for stress and mixed UI<sup>4</sup> and there is good evidence to show PFMT is effective in the short term (Dumoulin et al; Imamura et al). However it is not clear whether or how common intensifiers of PFMT (e.g. more contact with health professionals, use of adjuncts such as biofeedback) increase longer-term PFMT adherence, and the duration of effect. A recent series summarising the PFMT adherence literature<sup>5-9</sup> does suggest self-efficacy is one factor influencing women's ability to continue to perform self-care, such as PFMT, after treatment but there is a need for more research in this area to identify the full range of factors and how these impact on their UI symptoms in the longer-term.

Biofeedback (audio and/or visual feedback from a pressure or force-sensitive or electromyography device of a contraction of pelvic floor muscles) is often used as an adjunct to PFMT. A Cochrane review of the effectiveness of PFMT augmented with biofeedback concluded that women receiving biofeedback were more likely to report improved symptoms or cure than women who did not receive biofeedback however the effect might be confounded by greater amounts of health professional contact in women receiving biofeedback.<sup>10</sup> As a result Hagen and colleagues are conducting a large multicentre randomised control trial of the effectiveness and cost-effectiveness of long-term adherence to basic versus biofeedback-mediated intensive PFMT for female stress or mixed urinary incontinence (OPAL), with the same amount of health professional contact in both trial groups.<sup>11</sup> Unique to the trials conducted so far in this field, the OPAL trial has an embedded mixed-methods process evaluation (PE) to explore factors impacting on short and long-term adherence to PFMT, and any other mediating factors for treatment delivery and effectiveness. This process evaluation will draw on analysis of multiple datasets generated throughout the trial including the interviews with the therapists, audio-recorded consultations, treatment checklists and trial participant questionnaires, as well as on the findings from the longitudinal qualitative interviews exploring women's experiences of the OPAL intervention.

**Insert Figure 1: Trial flow diagram.**

### The OPAL trial

The OPAL trial is a large multicentre, pragmatic randomised controlled trial of two active treatment interventions, basic PFMT and biofeedback-mediated PFMT for the treatment of stress or mixed UI. The trial has been fully described in the companion trial protocol paper and further information is available on the trial website ([www.opaltrial.co.uk](http://www.opaltrial.co.uk)). In brief, 'Intensive' PFMT consists of basic PFMT with adjunctive biofeedback at every clinic appointment and at home. Both 'basic' and 'intensive' treatment groups are offered six clinic appointments over the 16 week intervention period. Women in both groups receive pelvic floor muscle assessment,<sup>12</sup> vaginal palpation, verbal feedback and individualised exercise prescription based on this assessment, advice for bowel and bladder symptoms and tailored lifestyle advice. Treatment is delivered by women's health physiotherapists or continence nurses who have received training designed and delivered by the trial team.<sup>11</sup> The premise is that biofeedback will intensify PFMT by offering women more visible information about exercise outcomes, support motivation and enhance behavioural skill (e.g. improved contraction technique and confidence). The anticipated outcome of adjunctive biofeedback is improved quality and quantity of exercise, with expectation this will increase treatment benefit and reduce symptoms. However, the biofeedback intervention can only work to intensify PFMT if women use the device.

### The OPAL longitudinal qualitative case study and process evaluation

The OPAL evaluation has a comprehensive and well-resourced longitudinal qualitative comparative case study and mixed method process evaluation running parallel to the trial, to provide important insights to the trial's processes and outcomes: to explain how the interventions worked (what factors led to the observed effect); assist in interpretation of the trial findings; and facilitate transferability into clinical practice (if effective) and further research (in particular if not effective). This design is rather unusual but allows the researchers to preserve multiple perspectives and contribute to the robustness of the complex analysis of factors mediating the trial delivery and findings. These studies will be cross referenced to support more comprehensive explanations of how the interventions work and assist in interpreting the trial findings. We describe each study in more detail below:

The qualitative case study is longitudinal in nature to mirror the trial data collection, to capture the dynamic nature of treatment delivery and participants' experiences, to generate more in-depth data about what works well (or not) when intensifying treatment regimens, and most importantly in this trial to better understand the factors important to long-term adherence to PFMT. Within the trials literature this longitudinal methodological design is rare, but it is needed to capture the dynamic nature of implementation and adherence to long-term PFMT treatment regimens; furthermore, the commissioning call for this work explicitly requested a qualitative study to explore women's experience and barriers to adherence. This qualitative case study will also make an important contribution to understanding the behavioural aspects of therapy which are rarely documented.

The process evaluation aims to provide transparency by exploring implementation of the interventions in context.<sup>13</sup> Variation in implementation of the OPAL interventions is likely to be due to: the different intervention components; the diverse clinical settings (university hospital, district general hospital, community settings) and health professionals delivering (women's health physiotherapists and incontinence specialist nurses); and, the contextual and personal differences

1  
2  
3 between women receiving the interventions and adhering to PFMT long-term. These different  
4 factors are likely to influence how well the interventions are integrated within existing practice and  
5 women's lives and may impact on the trial findings. As a result, we believe it is important to explore  
6 delivery (including fidelity and dose - if the intervention components are being delivered as intended  
7 and in what quantity across the different trial centres), response (participant's experiences of the  
8 intervention), and maintenance (how and why these processes are sustained over time or not by  
9 women and therapists during the intervention delivery and by women after the intervention delivery  
10 is complete).<sup>13</sup> For delivery, we are particularly interested in fidelity of function<sup>14</sup> as clinicians were  
11 given a protocol to follow with the expectation that they would individualise this (the exact exercise  
12 prescription, life-style advice etc.) to the care each woman required, however there were also  
13 specific behaviour change techniques that were to be used for all women (and not individualised)  
14 and so we will also be investigating fidelity of form for this element of the interventions. Women's  
15 experiences of receiving treatment in clinic and how they engage with PFMT at home is important to  
16 how they respond to the interventions. As OPAL is interested in long-term adherence to PFMT it is  
17 important to explore how women maintain their adherence (or not) and the factors which facilitated  
18 or impeded this. It is hypothesised that self-efficacy will be a mediating factor to intervention  
19 effectiveness. The longitudinal qualitative case study will support the process evaluation by  
20 providing data on 'response' and 'maintenance' to explain the women's experiences of receiving  
21 treatment, how and why they engaged with PFMT and/or biofeedback PFMT in the clinic and at  
22 home during treatment and how and why they maintained engagement (or not) over time.

### 23 24 25 26 27 28 29 30 **Aim and objectives**

31  
32 The overall aim of this mixed method evaluation is to understand why the interventions were  
33 effective or ineffective, understand implementation and the issues in short and long-term  
34 adherence to PFMT and to inform wider implementation (or further research if ineffective) as well as  
35 the PFMT intervention literature. Although inter-linked we describe each parallel evaluation (see  
36 Figure 1) separately to facilitate clarity as each evaluation has a specific objective.

37  
38  
39 Longitudinal comparative qualitative case study objective:

40  
41 To investigate women's experiences of the interventions, both basic and intensive PFMT, to identify  
42 the barriers and facilitators which impact on adherence in the short- and long-term, to explain the  
43 process through which they influence adherence, and to identify whether these differ between  
44 randomised groups.

45  
46  
47 Process evaluation objective:

48  
49 To identify and investigate the possible mediating factors that impact upon the effectiveness of the  
50 intervention (including intervention fidelity), how these mediating factors influence effectiveness,  
51 and whether the factors differ between randomised groups.

### 52 53 54 **Management and Governance**

55  
56 Ethical approval was granted by the West of Scotland Research Ethics Committee 4 (16/LO/0990)  
57 and the trial was registered on the ISRCTN registry (ISRCTN 57746448).

1  
2  
3 The longitudinal comparative qualitative case study and process evaluation management group has  
4 a mix of relevant clinical, qualitative, quantitative and theoretical skills and experience<sup>15</sup> and meets  
5 regularly to discuss the research management and emerging findings. In order to ensure allocation  
6 concealment is maintained, it has been agreed that this team will not discuss or present findings  
7 from this study with any staff from the main trial project management group. As a result these  
8 meetings are closed.  
9  
10

## 11 **METHODS AND ANALYSIS**

### 12 **Methods for longitudinal comparative qualitative case study**

13 A longitudinal, qualitative, two-tailed case study design<sup>16</sup> utilising semi-structured interviews with  
14 purposively sampled women from both groups to explore experience of, and adherence to, the trial  
15 interventions. The tails will be the experimental and comparator groups of the trial. Using a two  
16 tailed case study design complements the trial design in its comparative focus. The analysis, like the  
17 trial analysis, is set up to explore differences between the 'tails' or groups. In the case study design  
18 the differences can be exposed and support understanding of effectiveness (or non-effectiveness).  
19  
20  
21  
22

### 23 **Sampling and recruitment strategy**

24 Thirty to 40 randomised women (15 to 20 in each tail) will be purposively sampled for variance in  
25 centre type (district general hospital, university hospital, community delivered service), women's  
26 type of UI (stress or mixed) and therapist type (physiotherapist/ nurse), as case studies. Purposively  
27 selected women, who have consented to the trial, will be given an additional information leaflet and  
28 asked if they are interested in taking part in an interview study. Interested women will be contacted  
29 by telephone approximately a week later to ask if they would like to participate. If a woman declines  
30 to consent to the interview study, another woman with similar characteristics will be selected and  
31 approached. Formal written consent will be collected at the time of the first face-to-face interview.  
32 We anticipate some attrition of women by the 12 and 24 month interviews, however we have  
33 oversampled to ensure sufficient heterogeneity to identify barriers and facilitators to response to  
34 the interventions, and to generate hypotheses about the factors associated with differing outcomes,  
35 including long-term adherence to PFMT.  
36  
37  
38  
39  
40  
41

### 42 **Qualitative data collection**

43 Data will be collected by a series of semi-structured interviews at baseline, 6, 12 and 24 months (12  
44 and 24 months by telephone). Each interview will have a specific focus:

- 45 • Baseline (pre-treatment) interview (face-to-face) will explore the woman's experience of UI,  
46 the social contexts within which she experiences UI, and her expectations of treatment.
- 47 • Six month interview (face-to-face) will explore the woman's experience of the trial  
48 intervention, her adherence to therapy appointments and the prescribed programme, and  
49 factors that affected that adherence, and her perceptions of treatment outcome.
- 50 • 12 month interview (telephone) will explore the woman's experience of UI post-  
51 intervention, of the intervention, of factors that influence ongoing adherence to PFMT and  
52 of treatment outcome.  
53  
54  
55  
56  
57  
58  
59  
60



- 24 month interview (telephone) will explore the same issues as at 12 months but with a focus on the longer-term.

Interview data will be collected using a password protected audio digital recorder.

### **Qualitative case study data analysis**

Interview audio-recordings will be transcribed verbatim and entered into QSR NVivo software to support analysis. Analysis will be iterative with data generation and will take place on four interacting levels to facilitate within and cross case comparisons to ensure comprehensive examination which exposes the similarities and differences between the experimental and comparator groups and identifies barriers and facilitators to adherence:

- *At the level of the individual interview.* An initial *a priori* coding scheme will be applied that focuses on core areas of interest: specifically, women's experiences of UI; experience of PFMT +/- biofeedback; factors that influence adherence to supervised treatment and home exercise; and perceptions of treatment outcome. Research team discussions and constant iterative coding will further develop the coding scheme. The combination of the *a priori* scheme and inductive codes will aim, at this stage, to identify barriers and facilitators that influence adherence.
- *At the level of the case (woman).* Case summaries will be written with a focus on creating an understanding of women's experience in our areas of interest: the problem, the treatment, adherence to supervised treatment and home exercise; perceptions of treatment outcome and how these factors interact. Analysis at this stage will focus on identifying issues relating to changes over time and in developing theoretical propositions to guide subsequent analysis (Yin 2003).
- *At the level of the trial group.* All the cases for one trial group will be collected together and consistencies/ inconsistencies searched for. The aim of analysis at this stage is to identify the core barrier and facilitators within the trial group, the detailed explanations for them and interactions between them.
- *At the tail level.* The experimental and comparator tails will be compared to one another using the theoretical propositions. The aim of the analysis at this point is to identify similarities and differences in barriers and facilitators between the trial groups.

### **Methods for process evaluation**

This mixed methods process evaluation will focus on assessing fidelity of function (with additional checking of fidelity of form for the behavioural change techniques)<sup>14</sup> and explore delivery and implementation with therapists delivering the interventions in all centres. Fidelity will be assessed using theory-based and protocol-linked checklists completed by therapists at each appointment a woman attends and audio-recordings of a purposive sample of 100 therapy appointments which will be assessed against a theory driven framework derived from the trial protocol. Qualitative telephone interviews will be conducted with health professionals delivering the interventions at the end of their involvement in the trial. This is a concurrent study design with all methods being used simultaneously.

### **Process evaluation sampling and recruitment strategy and data collection**

- 1  
2  
3 1. A protocol checklist will be completed by all therapists after each appointment. The checklist  
4 will allow assessment of protocol deviations (as defined in the main trial and for statistical  
5 analysis purposes). It will also allow explanation of the clinically informed and permitted  
6 variance in delivery through tailoring of the intervention based on individual women's  
7 needs; alongside an explanation of the reasons the variance occurred.  
8  
9
- 10  
11 2. Audio-recordings will be conducted with a purposive sample of 100 appointments. These  
12 will be sampled for heterogeneity across: the comparator and experimental groups; the  
13 different therapy appointments (in both groups six therapy appointments across sixteen  
14 weeks); centre (aiming for inclusion of appointments at all centres); woman's type and  
15 severity of UI; and, therapist type (physiotherapist or incontinence nurse). Each centre will  
16 be provided with a password-protected audio digital recorder to record the selected  
17 appointments. We will aim to over sample audio-recordings for the first and last  
18 appointments due to our a priori hypothesis that treatment delivery may be more intensive  
19 and concentrated in the first and last appointments. The first appointment is a longer  
20 consultation and involves important education and training for being taught how to properly  
21 perform PFMT, where relevant including teaching of biofeedback, and for understanding any  
22 changes to lifestyle that may be recommended. The last appointment is important because  
23 therapy is coming to an end and women are being given important information to allow  
24 them to self-care, such as instructions regarding the maintenance dose of PFMT. If  
25 participants have signed on their consent form that they are willing to have an appointment  
26 audio-recorded, the researcher will purposively select participants and telephone them to  
27 ask if they would be willing to have a specific appointment recorded, answer any questions  
28 they may have and to take verbal consent. Therapists will then be informed which  
29 participants and appointments to record. The audio-recording devices will be returned to  
30 the researcher at regular intervals to download the data and to ensure the audio  
31 consultations are transcribed verbatim.  
32  
33
- 34 3. Semi-structured telephone interviews will be undertaken with therapists who have been  
35 involved in delivering the interventions at the end of their participation. We aim to interview  
36 at least one therapist from each site. A topic guide developed from the literature and from  
37 issues which have arisen during delivery of the intervention and from patient interviews will  
38 be utilised. The interviews will explore the therapist's experiences of delivering the PFMT  
39 and BF PFMT interventions, including their perspectives on adherence to delivering the  
40 protocols and women's adherence to intervention.  
41  
42
- 43 4. The trial follow-up questionnaires will include questions on women's adherence and self-  
44 efficacy to PFMT during and after the supervised intervention which will contribute to the  
45 process evaluation. This data will be analysed like secondary outcome measures (please see  
46 Hagen et al for more details).<sup>11</sup> In addition, the interview study (described earlier) will  
47 provide data from the women about adherence to treatment to feed into the process  
48 evaluation.  
49  
50  
51  
52  
53  
54  
55  
56

### 57 **Process evaluation analysis**

58  
59 Each data source will be analysed individually in the first instance to reach separate conclusions:  
60

- 1  
2  
3 1. Data from the checklists completed by the therapists will be summarised descriptively to  
4 report the extent to which there were consistent with the protocol. Free text comments  
5 from the therapists relating to any barriers and facilitators to delivering the protocol and any  
6 variations due to individual tailoring they experienced during appointments will be coded  
7 using a coding framework developed using content analysis with a 10% representative  
8 sample of appointments.  
9  
10
- 11 2. Data from interviews with therapists will be analysed using the Framework Approach  
12 (Ritchie et al).<sup>17</sup> Following familiarisation with the data, a thematic framework will be  
13 developed and applied across the data set. Data will then be tabulated and conceptual maps  
14 used to make links between themes. Where possible in-vivo codes and concepts will be  
15 utilised.  
16  
17
- 18 3. A quantitative coding scheme will be developed for analysis of the appointment audio-  
19 recordings. This coding scheme will be developed using the intervention protocols and the  
20 theory underlying the protocols, and data generated from a purposive sample of recordings  
21 (treatment arm, visit number and site). The coding scheme will contain explicit guidance as  
22 to what codes have to be applied in what circumstances. The audio recordings will then be  
23 coded and entered into SPSS. Coded data will then be subject to descriptive and interpretive  
24 analysis.  
25  
26
- 27 4. Data from main study self-report questionnaires will be analysed in line with the Statistical  
28 Analysis Plan. Specifically, and as indicated in the main standard operating procedure, we  
29 will undertake a mediational analyses as part of the quantitative process evaluation, this  
30 will focus on the self-efficacy data as our hypothesised mediating variable. The details of  
31 the mediational analyses are described in the process evaluation analysis plan.  
32  
33  
34  
35

### 36 **Synthesising the data from the longitudinal comparative case study and the process evaluation**

37  
38 Synthesis will be undertaken once both analyses are complete, where the case study analysis will be  
39 cross referenced and synthesised with the process evaluation findings. Data synthesis will be  
40 undertaken whereby the findings from individual data sources will be presented in matrices that  
41 bring together key issues from the different analyses to draw hypotheses about why the  
42 intervention components were implemented more successfully than others and explore if there is a  
43 synergistic effect and if these are related to patient's experiences of BF PFMT and PFMT treatment.  
44 We will also elucidate the causal mechanisms which lead to change (or not) in each arm and suggest  
45 which components of the interventions were more successful and why. The combined data will also  
46 allow us to present a nuanced analysis of context. This will provide important information about  
47 implementation of the interventions and if and how the interventions can be transferred to other  
48 settings.  
49  
50  
51  
52

### 53 **Integration of the case study, process evaluation and trial findings**

54  
55 Both studies will be analysed separately before the outcome of the trial is known and the main trial  
56 will be analysed without knowledge of the longitudinal case study and process evaluation findings.<sup>18</sup>  
57 The main trial research team and the research team have agreed that no case study/process  
58 evaluation data will be shared before the trial code is broken. Following identification of the main  
59  
60

1  
2  
3 trial findings, subsequent analysis of the case study and process evaluation data will be undertaken.  
4 There will be transparency in reporting which findings were identified prior to, and after, the trial  
5 findings being known.  
6

### 7 8 **Public patient involvement**

9  
10 OPAL has a woman who has experience of urinary incontinence (UI) as a grantholder and has patient  
11 representation on the Trial Steering Committee. Through these inputs, the research question,  
12 outcome measures, and study design have all had women's perspectives included. Patient facing  
13 recruitment materials were all reviewed by women with urinary incontinence. Women were not  
14 involved in other aspects of study recruitment or conduct. Participants will all receive a lay summary  
15 of the results of the study. The burden of the intervention was assessed by our grant holder with UI.  
16 Our grantholder is named as an author on our main trial protocol paper.  
17  
18

### 19 20 **ETHICS AND DISSEMINATION**

21  
22 The study will be conducted in accordance with the ICH GCP Note for Guidance on Good Clinical  
23 Practice. Favourable ethics opinion covering recruitment across all UK NHS centres was obtained and  
24 approved from the Regional NHS Ethics Committee and local R&D departments.  
25

26 Final trial results will be disseminated to the funding body, the NIHR Health Technology Assessment  
27 Programme. The trial results will be then submitted to peer-reviewed journals and presented at  
28 international conferences. Participants will be provided with a summary of the results.  
29  
30

### 31 32 **STUDY TIMELINES**

33 Funding for this study was approved on the 14<sup>th</sup> August 2012

34 The Trial and qualitative evaluation and process evaluation all started 1st September 2013 and  
35 finished 30<sup>th</sup> November 2018.  
36  
37  
38  
39

### 40 41 **REFERENCES**

- 42  
43 1. Abrams P, Cardozo L, Wagg A, et al. Incontinence. 6th ed. Bristol: Health Publications Ltd 2017.  
44 2. Perry S, Shaw C, Assassa P, et al. An epidemiological study to establish the prevalence of urinary  
45 symptoms and felt need in the community: the Leicestershire MRC Incontinence Study.  
46 Leicestershire MRC Incontinence Study Team. *Journal of public health medicine*  
47 2000;22(3):427-34.  
48 3. Turner DA, Shaw C, McGrother CW, et al. The cost of clinically significant urinary storage  
49 symptoms for community dwelling adults in the UK. *BJU international* 2004;93(9):1246-52.  
50 doi: 10.1111/j.1464-410x.2004.04806.x [doi]  
51 4. NICE. Urinary incontinence in women. Quality standard (QS77). National Institute for Health and  
52 Care Excellence, 2015.  
53 5. Dumoulin C, Hay-Smith J, Frawley HC, et al. 2014 Consensus statement on improving pelvic floor  
54 muscle training adherence: International continence society 2011 state-of-the-science  
55 seminar. *Neurourology and urodynamics* 2015;1-6. doi: 10.1002/nau.22796  
56 6. Frawley HC, McClurg D, Mahfooza A, et al. Health professionals' and patient perspectives on pelvic  
57 floor muscle training adherence - 2011 ICS State-of-the-science seminar research paper IV of  
58 IV *Neurourology and urodynamics* 2015;34:632-39. doi: 10.1002/nau.227774  
59  
60

7. Hay-Smith J, Dean S, Burgio K, et al. Pelvic floor muscle training adherence "modifiers": A review of primary qualitative studies - 2011 ICS State-of-the-science seminar research paper III of IV *Neurourology and urodynamics* 2015;34:622-31. doi: 10.1002/nau.22771
8. Dumoulin C, Alewijnse D, Bo K, et al. Pelvic floor muscle training: Tools, measurements and strategies - 2011 ICS State-of-the-science seminar research paper II. *Neurourology and urodynamics* 2015:1-7. doi: 10.1002/nau.22794
9. McClurg D, Frawley HC, Hay-Smith J, et al. Scoping review of adherence promotion theories in pelvic floor muscle training - 2011 ICS State-of-the-science seminar research paper I of IV. *Neurourology and urodynamics* 2015:1-9. doi: 10.1002/nau.22769
10. Herderschee R, Hay-Smith J, Herbison G, et al. Feedback or biofeedback to augment pelvic floor muscle training for urinary incontinence in women. *Cochrane Database of Systematic Reviews* 2011(7):CD009252.
11. Hagen S, McClurg D, Bugge C, et al. Effectiveness and cost-effectiveness of basic versus biofeedback-mediated intensive pelvic floor muscle training for female stress or mixed incontinence: protocol for the OPAL randomised controlled trial. Submitted to BMJ Open
12. Laycock J, Jerwood D. Pelvic floor muscle assessment: The PERFECT scheme. *Physiotherapy* 2001;87(12):631-42.
13. Grant A, Treweek S, Dreischulte T, et al. Process evaluations for cluster-randomised trials of complex interventions: a proposed framework for design and reporting. *Trials* 2013;14(1):15.
14. Hawe P, Shiell A, Riley T. Complex interventions: how "out of control" can a randomised controlled trial be? *British medical journal* 2004;328(7455):1561-63.
15. Medical RC. Process evaluation of complex interventions: UK Medical Research Council (MRC) guidance. 2015
16. Yin R. Case Study Research: Design and Methods. London: Sage Publications 2003.
17. Ritchie J, Spencer L, O'Connor W. Carrying out Qualitative Analysis. In: Ritchie J, Lewis J, eds. *Qualitative Research Practice, A guide for Social Science Students and Researchers*. London: Sage Publications Ltd 2003.
18. Oakley A, V S, Bonell C, et al. Process evaluation in randomised controlled trials of complex interventions. *British medical journal* 2006;332(7538):413-16.

### **AUTHOR CONTRIBUTIONS**

CB, SD, JHS were involved in the initial conceptualisation and study design, AG and AT are involved with participants and data collection and CB, SD, AG, JHS, MK, AT are involved in data analysis. SH is the PI and along with DMcC advise on interpretation of the data in light of the trial results. AG wrote the paper. All authors contributed to, read and approved the final manuscript. CB is responsible for this manuscript.

### **FUNDING ACKNOWLEDGEMENT**

This project, Optimising Pelvic floor Exercises to Achieve Long-term benefits (OPAL) is funded by the NIHR Health Technology Assessment Programme (project reference: 11/71/03). The authors also acknowledge the support of the National Institute for Health Research, through the Comprehensive Clinical Research Network. SD's position is partly supported by the National Institute for Health Research (NIHR) Collaboration for Leadership in Applied Health Research and Care South West Peninsula at the Royal Devon and Exeter NHS Foundation Trust.

### **DEPARTMENT OF HEALTH AND SOCIAL CARE DISCLAIMER**

1  
2  
3 The views expressed are those of the authors and not necessarily those of the NHS, the NIHR or the  
4 Department of Health and Social Care.  
5  
6  
7

8  
9 **COMPETING INTERESTS STATEMENT**

10 The authors declare they have no competing interests.  
11  
12  
13

14  
15 **Figure Legend**

16  
17 Figure 1: Trial flow diagram.  
18  
19  
20  
21  
22  
23  
24  
25  
26  
27  
28  
29  
30  
31  
32  
33  
34  
35  
36  
37  
38  
39  
40  
41  
42  
43  
44  
45  
46  
47  
48  
49  
50  
51  
52  
53  
54  
55  
56  
57  
58  
59  
60

For peer review only

# THE OPAL TRIAL

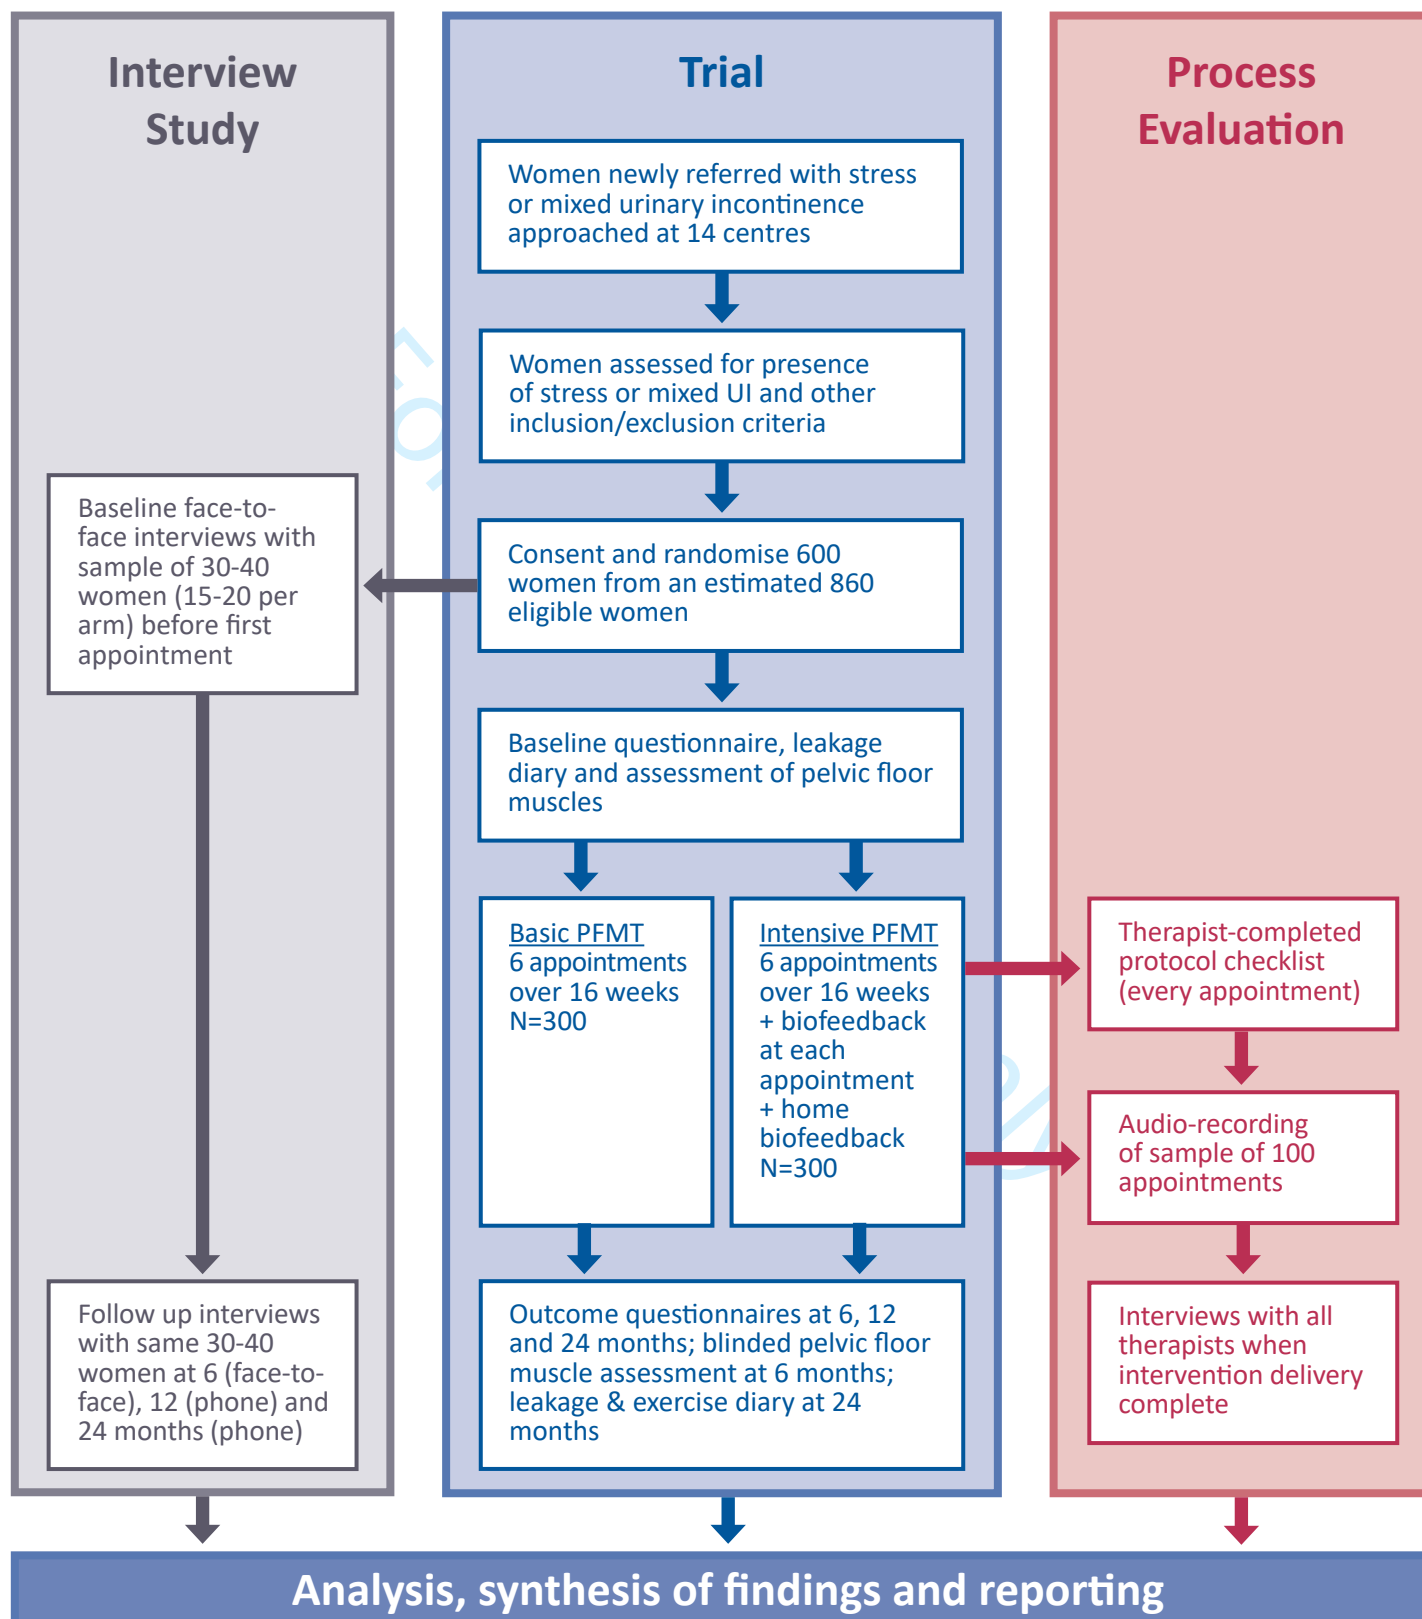

**Analysis, synthesis of findings and reporting**

For peer review only - <http://bmjopen.bmj.com/site/about/guidelines.xhtml>
